# Supplementary material for: A facile hydrothermal synthesis of 3D flowerlike CeO2via a cerium oxalate precursor
Source: Royal Society of Chemistry journal article supplement (doi:10.1039/c3ta10487g), 2013-01-01
Supplement: c3ta10487g.pdf [file c3ta10487g.pdf]

## A facile hydrothermal synthesis of 3D flowerlike CeO<sub>2</sub> via cerium oxalate precursor

Wei Liu<sup>a</sup>, Lijun Feng<sup>a</sup>, Cong Zhang<sup>a</sup>, Hongxiao Yang<sup>a</sup>, Jinxin Guo<sup>a</sup>, Xiufang Liu<sup>a</sup>,  
Xueying Zhang<sup>a</sup> and Yanzhao Yang<sup>\*a</sup>

<sup>a</sup> Key Laboratory for Special Functional Aggregate Materials of Education Ministry, School of Chemistry and Chemical Engineering, Shandong University, Jinan, 250100, P. R. China. Fax: +86-531-88564464; Tel: +86-531-88362988; E-mail: yzhyang@sdu.edu.cn.

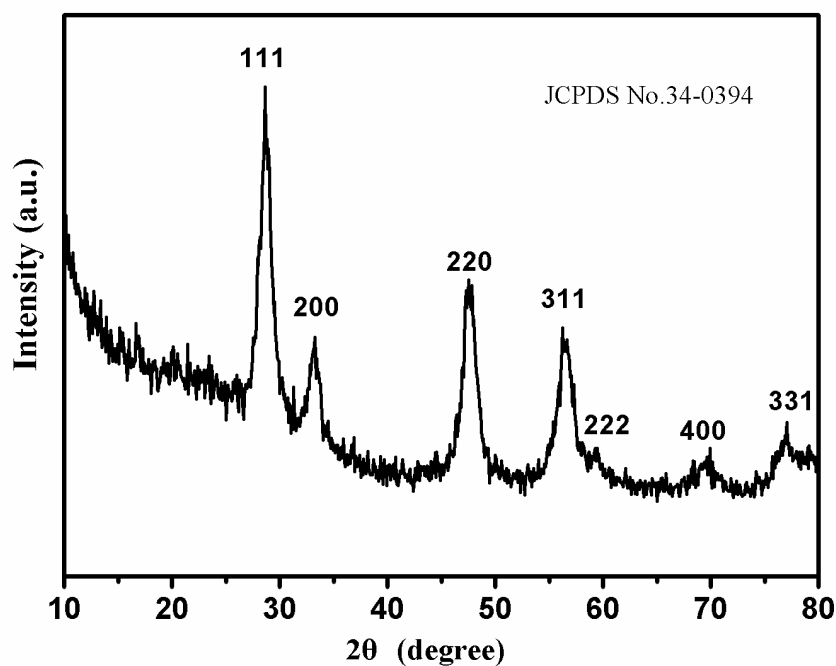

Fig. S1 XRD pattern of the product obtained by the calcination of the cerium oxalate precursor at 300 °C for 1 h.

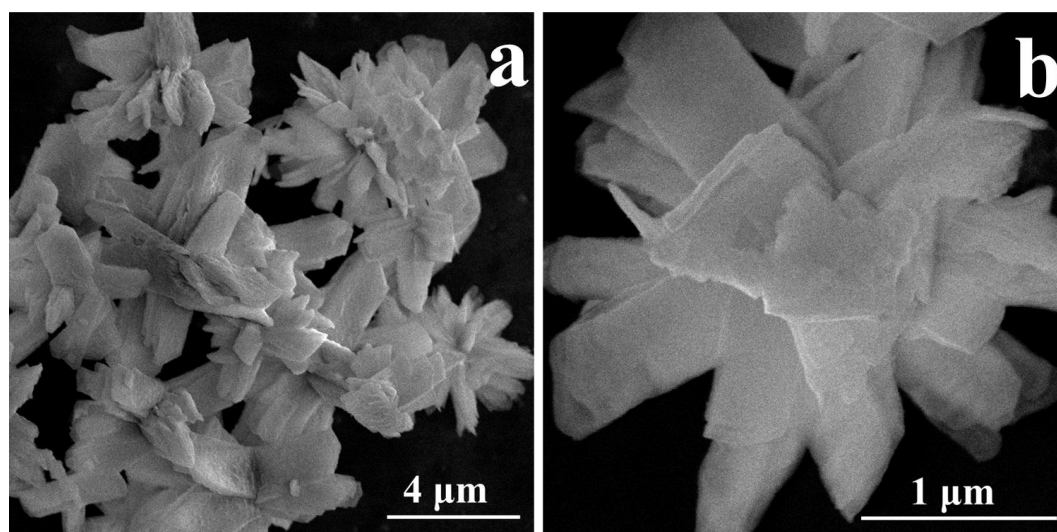

Fig. S2 Representative SEM images of CeO<sub>2</sub> microflowers after calcination method via cerium oxalate precursor: (a) over morphology of the products; (b) SEM image of an single microflower.

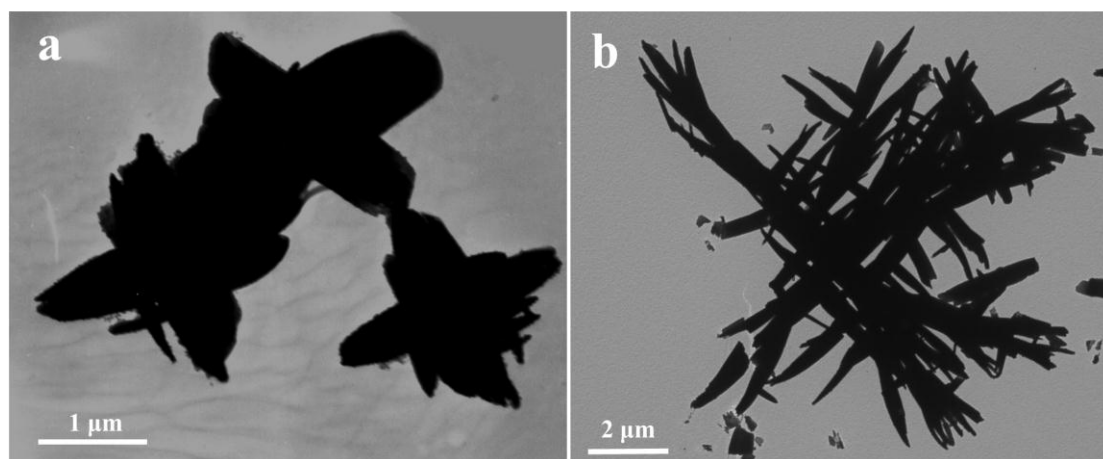

Fig. S3 The TEM images of the products when the dosage of the oxalic acid is 0.16 mmol (a) and 0.64 mmol (b).

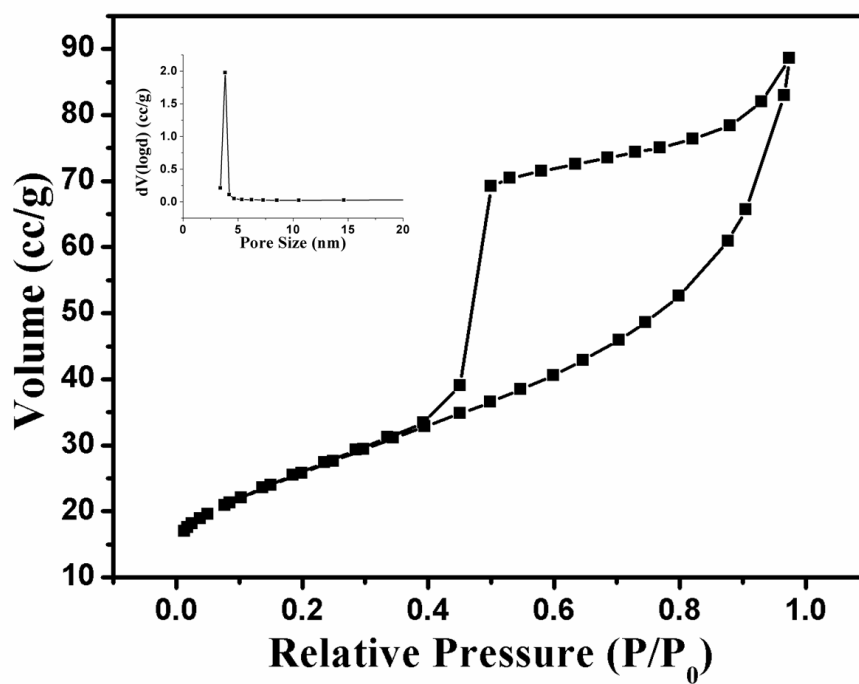

Fig. S4 N<sub>2</sub> adsorption- desorption isotherms of the CeO<sub>2</sub> flowerlike structures after calcination method; inset is the corresponding BJH pore size distribution curve.
